# Supplementary material for: Rational design of 3D inverse opal heterogeneous composite microspheres as excellent visible-light-induced NO2 sensors at room temperature
Source: Royal Society of Chemistry journal article supplement (doi:10.1039/c7nr08366a), 2018-01-01
Supplement: c7nr08366a1.pdf [file c7nr08366a1.pdf]

## Electronic Supplementary Information

### **Rational Design of 3D Inverse Opals Heterogeneous Composites Microspheres as Excellent Visible-Light-Induced NO<sub>2</sub> Sensor at Room Temperature**

Tianshuang Wang, Qi Yu, Sufang Zhang, Xueying Kou, Peng Sun\* and Geyu Lu\*

State Key Laboratory on Integrated Optoelectronics, College of Electronic Science and Engineering,  
Jilin University, 2699 Qianjin Street, Changchun 130012, People's Republic of China.

Corresponding Authors: Tel: +86-431-85167808; Fax: +86-431-86167808.

E-mail addresses: [pengsun@jlu.edu.cn](mailto:pengsun@jlu.edu.cn) (Peng Sun); [lugy@jlu.edu.cn](mailto:lugy@jlu.edu.cn) (Geyu Lu).

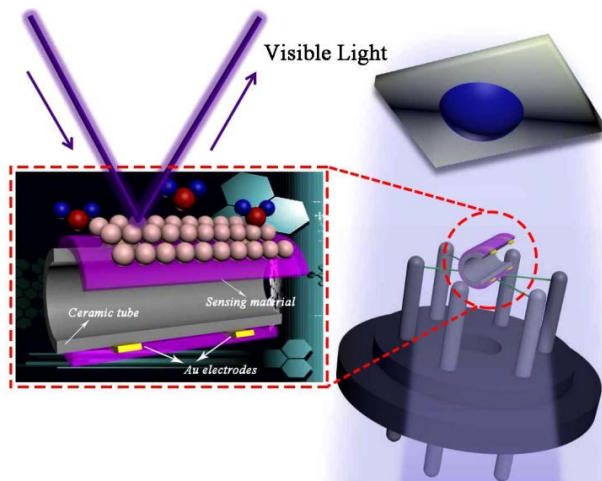

Figure S1. The detailed schematic of gas sensor instrument.

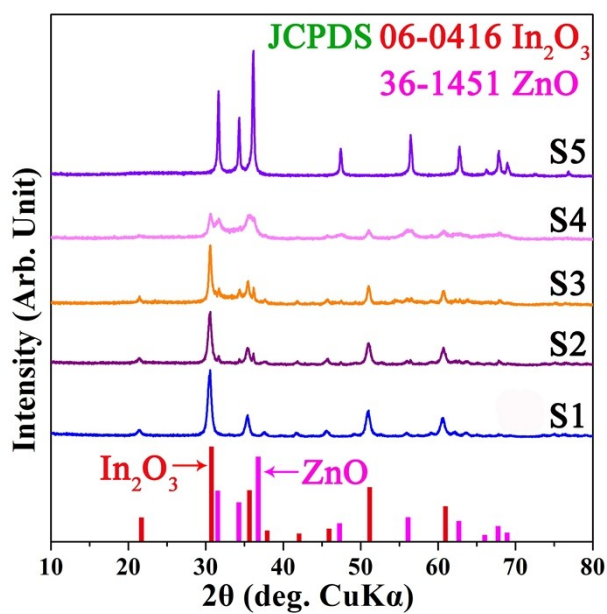

Figure S2. XRD patterns of the as-prepared S1-S5 samples.

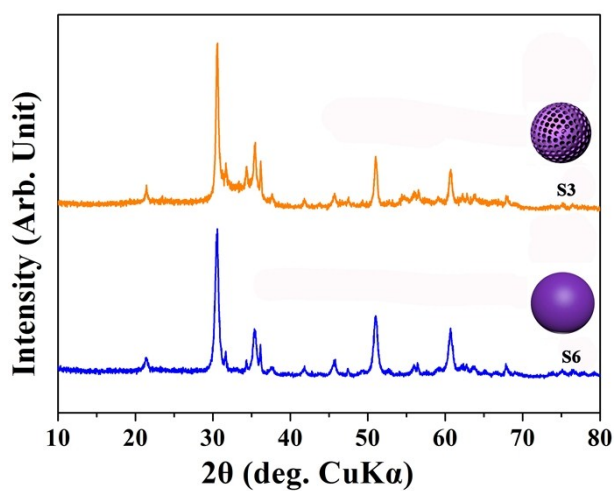

Figure S3. XRD patterns of the as-prepared S3 and S6 samples.

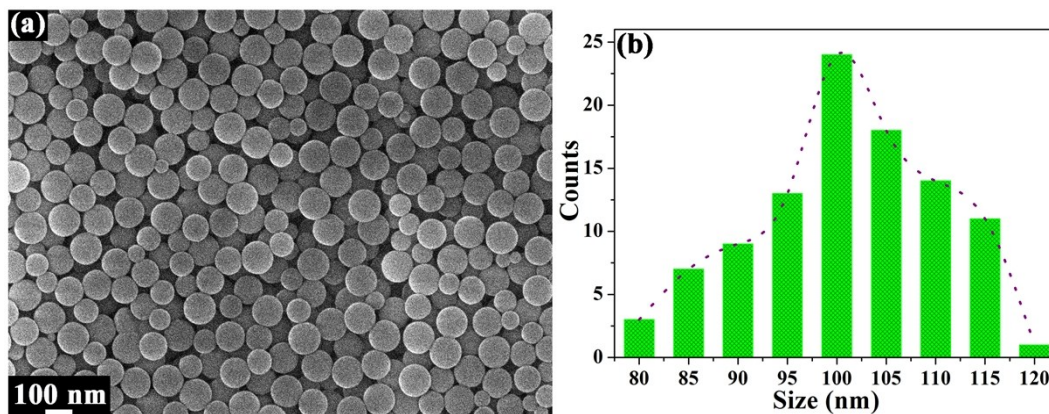

**Figure S4.** (a) Scanning electron microscopy (SEM) image and (b) the size distribution histogram of the S-PS spheres.

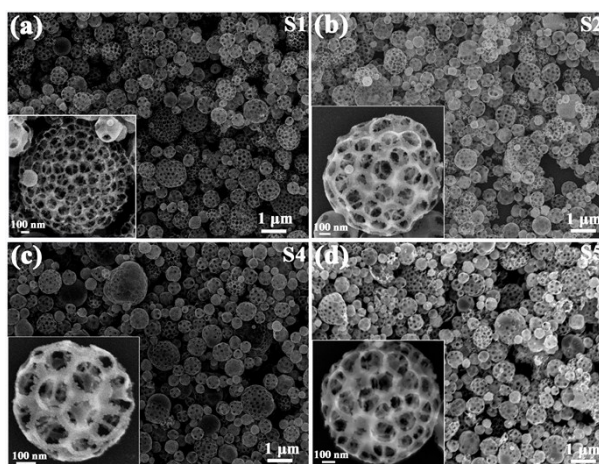

**Figure S5.** Typical SEM images of the as-prepared products (a) 3D IO  $\text{In}_2\text{O}_3$  microspheres (S1 sample), (b and c) 3D IO  $\text{In}_2\text{O}_3$ -ZnO HCMs (S2 and S4 samples), (d) 3D IO ZnO microspheres (S5 sample).

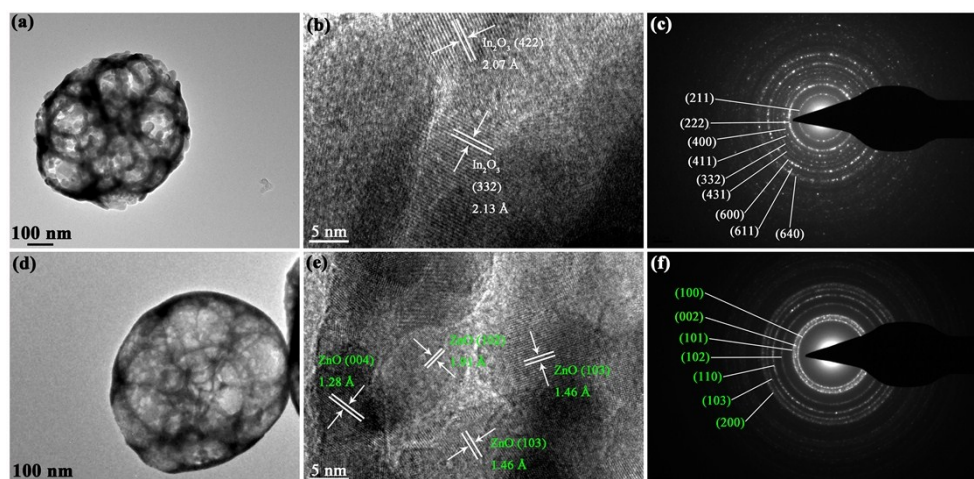

**Figure S6.** TEM images of (a) S1 and (d) S5 samples; HRTEM images of (b) S1 and (e) S5 samples; SAED patterns of (c) S1 and (f) S5 samples.

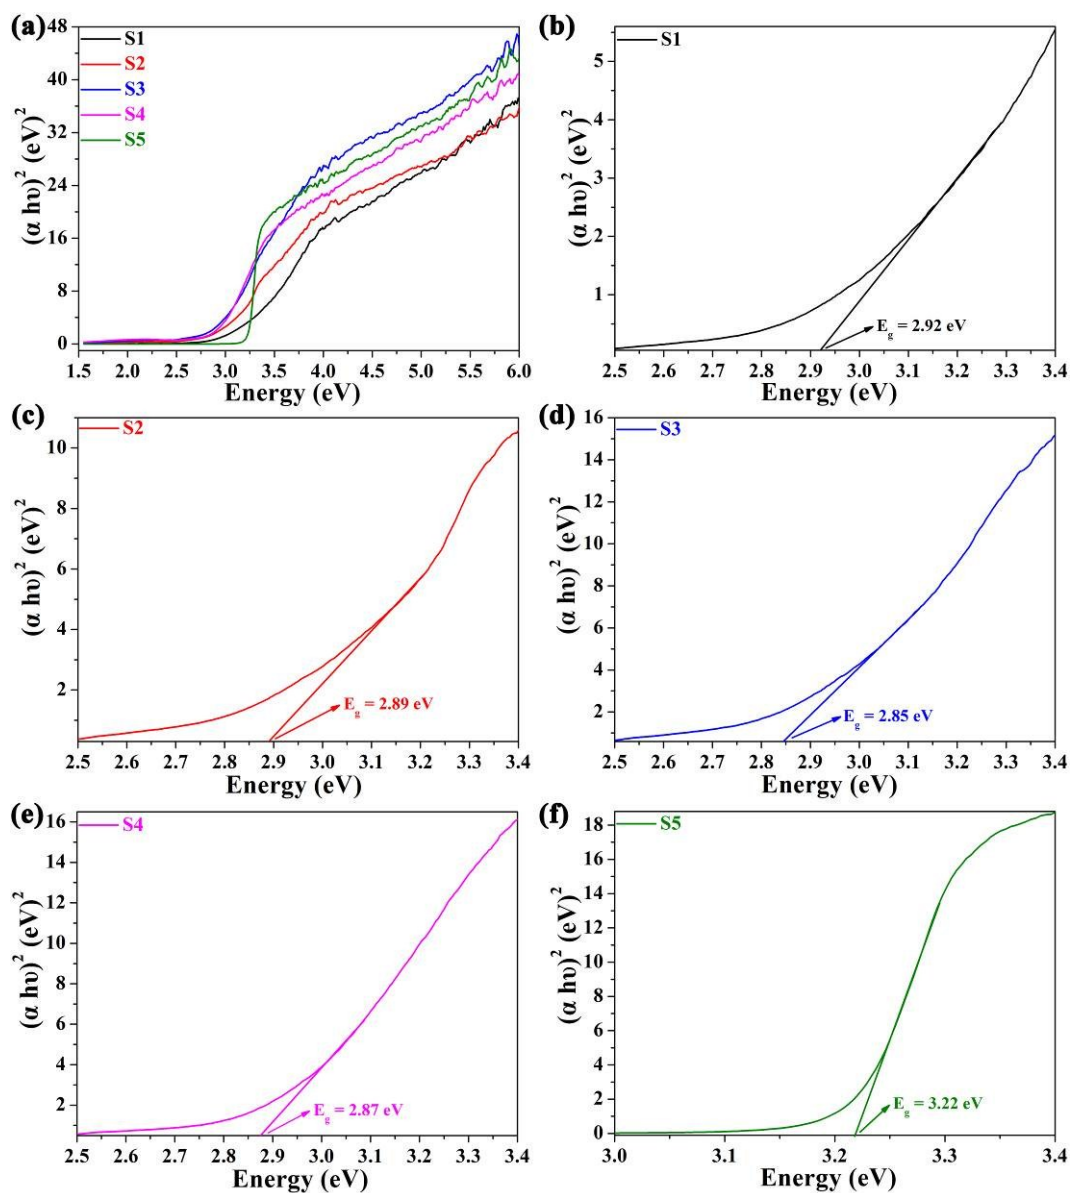

**Figure S7.** (a-f) The estimated band gap energy of 3D IO In<sub>2</sub>O<sub>3</sub>-ZnO HCMs with different component ratios (S1-S5 samples).

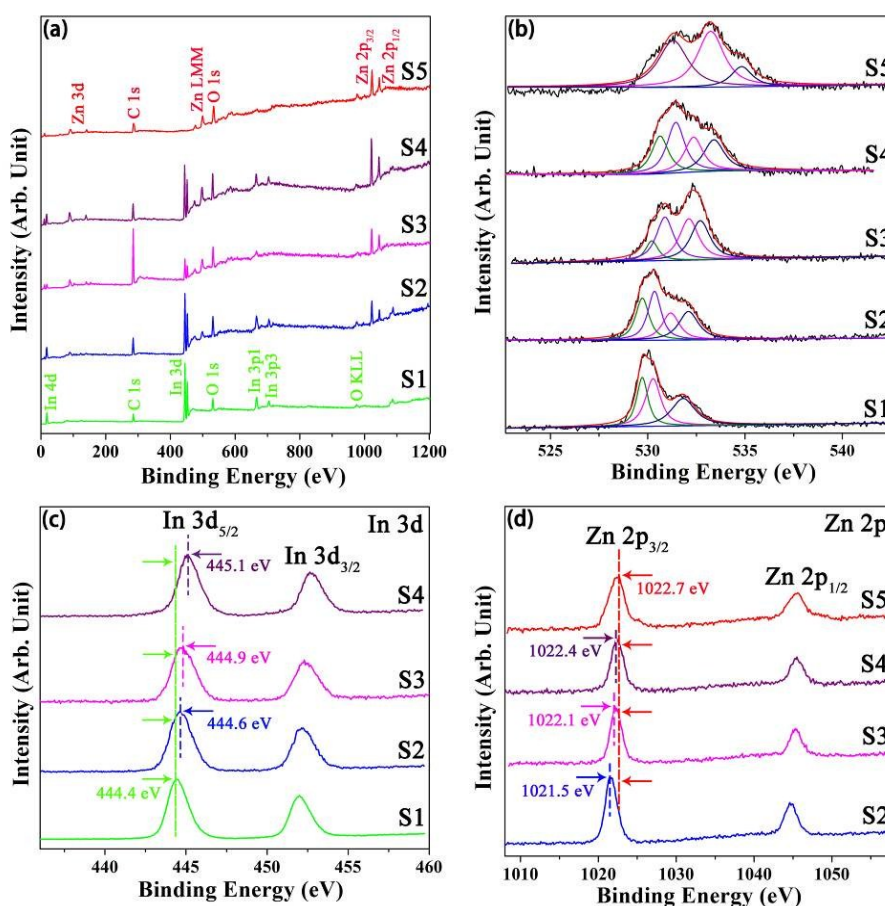

**Figure S8.** (a) The complete XPS spectra and (b) the corresponding enlarged O 1s XPS spectra of S1-S5 samples, the detailed XPS spectra of (c) In 3d core level region of S1-S4 samples and (d) Zn 2p core level region of S2-S5 samples.

The X-ray photoelectron spectroscopy (XPS) was used to investigate the surface elemental composition and chemical status of the as-prepared S1-S5 samples (**Figure S8**). In the full range spectra **Figure S8(a)**, peaks corresponding to C, O, In and/or Zn were clearly observed in different samples, and no impurities could be found. The O 1s XPS spectra of various samples were enlarged in **Figure S8(b)**. Accordingly, the O 1s peaks of the S1 and S5 samples were both fitted to three peaks by Gaussian simulation peaks, which could be attributed to three kinds of oxygen species: the lattice oxygen  $O_L$  in crystalline  $In_2O_3$  (529.7 eV) and ZnO (530.3 eV), the middle of the three curves is  $O_V$  component in oxygen vacancy regions, and the  $O_C$  component is assigned to chemisorbed or dissociated oxygen or -OH species, respectively. The samples (S2-S4) all displayed four peaks due to different chemical environment of O in composite oxides, each characteristic peak had some shift. The four peaks located at around 530, 530.9, 531.9 and 532.7 eV, respectively. Accordingly, the In 3d high-resolution XPS spectra of S1-S4 samples can be observed in **Figure S8(c)**. For S1 sample, the two strong peaks centered at 444.4 and 452 eV correspond to the In 3d<sub>5/2</sub> and In 3d<sub>3/2</sub>, respectively. The Zn 2p high-resolution XPS spectra (**Figure S8(d)**) in S2-S5 samples showed two symmetric peaks with the same spin-orbit splitting (~23eV), and the peaks around 1022.7 eV and 1045.6 eV confirmed the presence of Zn 2p<sub>3/2</sub> and Zn 2p<sub>1/2</sub> peaks, respectively. Compared to pure  $In_2O_3$  and ZnO, with the increasing amount of the other materials in the  $In_2O_3$ -ZnO heterogeneous composites samples, the binding energy of the In 3d (3d<sub>5/2</sub> and 3d<sub>3/2</sub>) gradually shifted to higher binding energy, and the binding energy of the Zn 2p (2p<sub>3/2</sub> and 2p<sub>1/2</sub>) gradually shifted to lower binding energy. This could be attributed to the electronic interactions that existed between the components in the heterogeneous composites. As well due to more majority carriers may be transferred, the shift degree of the In 3d or Zn 2p spectrum in the  $In_2O_3$ -ZnO heterogeneous composites will become more obvious.

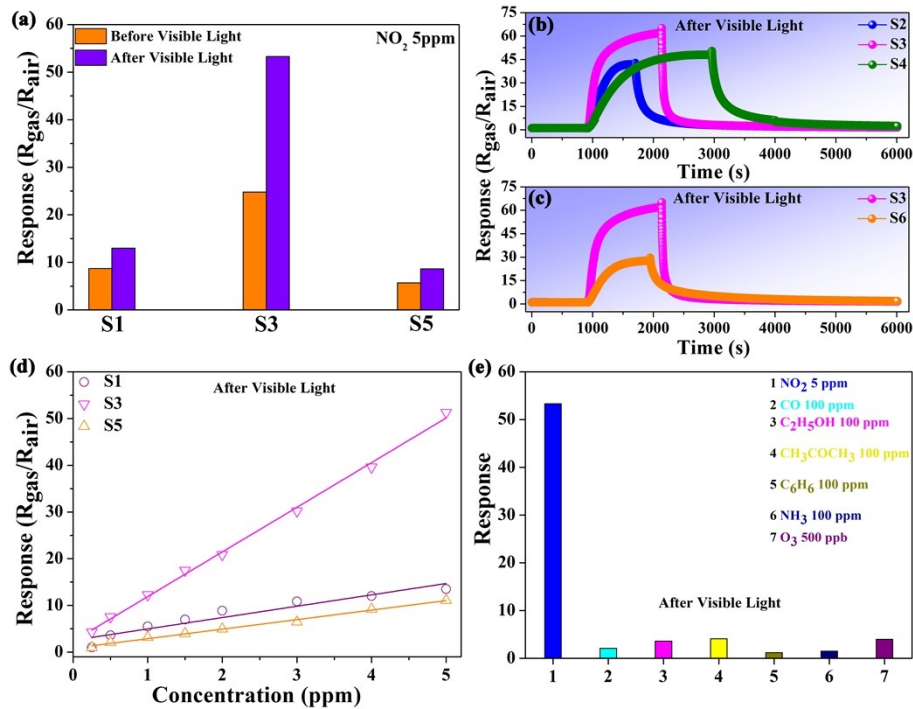

**Figure S9.** (a) The gas responses of the S1, S3 and S5 sensors toward 5 ppm NO<sub>2</sub> before and after visible light. (b) Gas sensing transients of the S2-S4 sensors when exposed to 5 ppm of NO<sub>2</sub> after visible light. (c) The gas sensing transients of S3 and S6 at room temperature under visible light irradiation. (d) Responses vs NO<sub>2</sub> concentration for the S1, S3 and S5 sensors under visible light irradiation. (e) Selectivity of the S3 sensor to various gases under visible light irradiation.

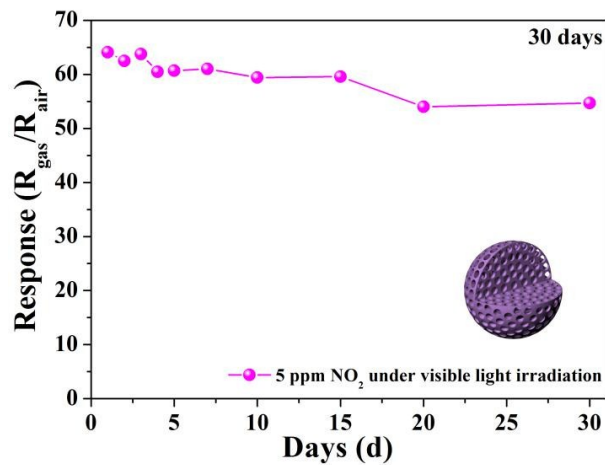

**Figure S10.** Long-term stability of the gas sensor based on the S3 sample.

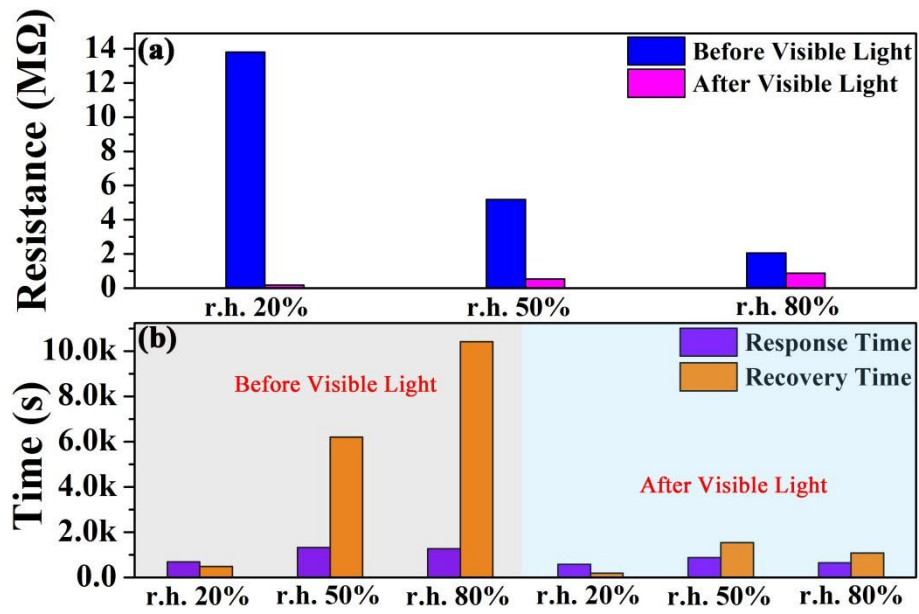

**Figure S11.** (a) The resistance in air ( $R_a$ ) of the S3 sensor with various relative humidity (r.h. = 20%, 50% and 80%) at room temperature (25 °C) before and after visible light. (b) Relative humidity vs. response and recovery times plots at 25 °C for the S3 sensor.

**Table S1.** Comparison of gas sensing performances of some room-temperature NO<sub>2</sub> gas sensors.

| Materials                                         | Methods                      | Concentration<br>[ppm] | NO <sub>2</sub> response<br>[R <sub>gas</sub> /R <sub>air</sub> ] | Recovery time<br>[s] | Light sources |
|---------------------------------------------------|------------------------------|------------------------|-------------------------------------------------------------------|----------------------|---------------|
| ZnO <sup>[1]</sup>                                | Gravity<br>deposition        | 1                      | 2.5                                                               | 40                   | UV light      |
| ZnO <sup>[2]</sup>                                | Suspension<br>flame spraying | 1                      | 3.6                                                               | 480                  | Visible light |
| ZnO <sup>[3]</sup>                                | Gravity<br>deposition        | 1                      | 3                                                                 | ---                  | UV light      |
| ZnO/In <sub>2</sub> O <sub>3</sub> <sup>[4]</sup> | Co-precipitation             | 5                      | 2.2                                                               | 695                  | UV light      |
| CdS/ZnO <sup>[5]</sup>                            | Hydrothermal                 | 1                      | 4.5                                                               | 227                  | Visible light |
| This work                                         | USP                          | 1                      | 12.3                                                              | 215                  | Visible light |



## References

1. X. S. Su, L. Gao, F. Zhou, W. P. Cai and G. T. Duan, "Close network" effect of a ZnO micro/nanoporous array allows high UV-irradiated NO<sub>2</sub> sensing performance, *RSC Adv.*, **2017**, 7 (34), 21054.
2. X. Geng, C. Zhang, Y. F. Luo and M. Debliquy, Flexible NO<sub>2</sub> gas sensors based on sheet-like hierarchical ZnO<sub>1-x</sub> coatings deposited on polypropylene papers by suspension flame spraying, *J. Taiwan Inst. Chem. E.*, **2017**, 75, 280.
3. X. S. Su, G. T. Duan, Z. K. Xu, F. Zhou and W. P. Cai, Structure and thickness-dependent gas sensing responses to NO<sub>2</sub> under UV irradiation for the multilayered ZnO micro/nanostructured porous thin films, *J. Colloid Interf. Sci.*, **2017**, 503, 150.
4. E. Espid, F. Taghipour, Development of highly sensitive ZnO/In<sub>2</sub>O<sub>3</sub> composite gas sensor activated by UV-LED. *Sens. Actuators B*, **2017**, 241, 828.
5. Z. Yang, L. J. Guo, B. Y. Zu, Y. N. Guo, T. Xu and X. C. Dou, CdS/ZnO core/shell nanowire-built films for enhanced photodetecting and optoelectronic gas-sensing applications, *Adv. Optical Mater.*, **2014**, 2, 738.
